# Supplementary material for: Genetic Diversity and Population Structure of the Critically Endangered Yangtze Finless Porpoise (Neophocaena asiaeorientalis asiaeorientalis) as Revealed by Mitochondrial and Microsatellite DNA
Source: PubMed Central journal article supplement (PMC4139784; doi:10.3390/ijms150711307), 2014-06-25
Supplement: ijms-15-11307-s001.pdf [file ijms-15-11307-s001.pdf]

## Supplementary Information

**Table S1.** Likelihood of the number of population clusters,  $K$ . Columns 3 and 4 summarize the likelihoods and associated variances for different runs.

|                           | <b>Independent Runs</b> | <b>Ln <math>P(D)</math></b> | <b>Var [Ln <math>P(D)</math>]</b> |
|---------------------------|-------------------------|-----------------------------|-----------------------------------|
| <b><math>K = 1</math></b> | Run1                    | -5652.3                     | 41.8                              |
|                           | Run2                    | -5652.5                     | 42.2                              |
|                           | Run3                    | -5652.2                     | 41.5                              |
|                           | Run4                    | -5652.2                     | 41.4                              |
|                           | Run5                    | -5652.7                     | 42.3                              |
| <b><math>K = 2</math></b> | Run1                    | -5656.3                     | 376.8                             |
|                           | Run2                    | -5711.2                     | 449.5                             |
|                           | Run3                    | -5692.8                     | 441.5                             |
|                           | Run4                    | -5683.2                     | 421.4                             |
|                           | Run5                    | -5657.6                     | 379.4                             |
| <b><math>K = 3</math></b> | Run1                    | -5614.5                     | 462.6                             |
|                           | Run2                    | -5622.9                     | 475.7                             |
|                           | Run3                    | -5624.0                     | 483.0                             |
|                           | Run4                    | -5608.4                     | 442.8                             |
|                           | Run5                    | -5612.6                     | 459.6                             |

**Figure S1.** Results of STRUCTURE analyses. **(a)** Value of  $\text{Ln } P(D)$  from 10 independent runs for  $K = 1-10$ ; **(b)** Value of  $K$  as a function of  $\Delta K$  based on 10 runs.

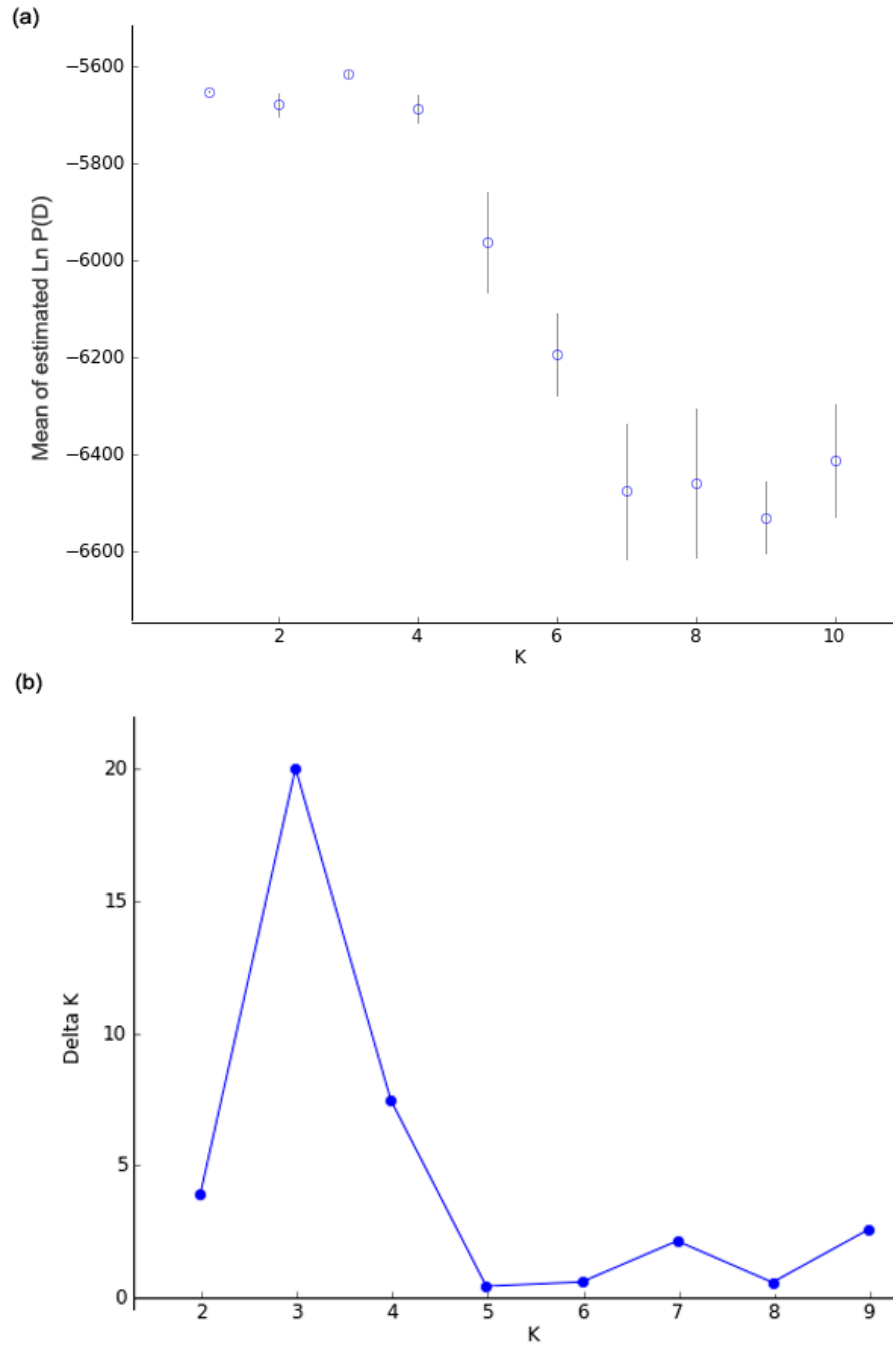

**Figure S2.** Estimated population structure when  $K = 2$  and  $K = 3$ . Each individual is represented by a vertical line. The different local populations are separated by black lines. The population units are labeled in numbers (1: PY, 2: SH, 3: TL, 4: AQ, 5: EZHS, 6: WH, 7: HHPZ, 8: DT, 9: XCSS).

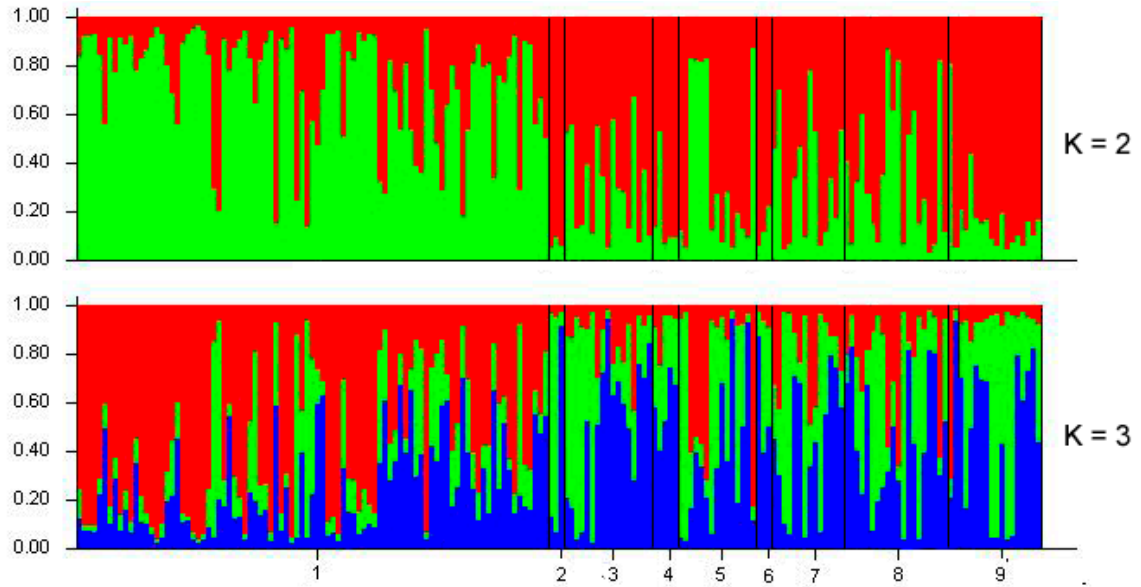

**Table S2.** Genetic diversity of each locus in each local population.

| LOCUS          | TL       |           |           |           |                       | PY       |           |           |           |                       | EZHS     |           |           |           |                       |
|----------------|----------|-----------|-----------|-----------|-----------------------|----------|-----------|-----------|-----------|-----------------------|----------|-----------|-----------|-----------|-----------------------|
|                | <i>N</i> | <i>AR</i> | <i>Ho</i> | <i>He</i> | <i>F<sub>is</sub></i> | <i>N</i> | <i>AR</i> | <i>Ho</i> | <i>He</i> | <i>F<sub>is</sub></i> | <i>N</i> | <i>AR</i> | <i>Ho</i> | <i>He</i> | <i>F<sub>is</sub></i> |
| <b>YFSSR1</b>  | 6        | 5.47      | 0.706     | 0.635     | -0.032                | 5        | 4.039     | 0.633     | 0.621     | -0.003                | 3        | 2.953     | 0.385     | 0.394     | -0.062                |
| <b>YFSSR5</b>  | 6        | 5.62      | 0.857     | 0.771     | -0.114                | 9        | 6.024     | 0.759     | 0.816     | 0.071                 | 6        | 5.981     | 0.813     | 0.822     | -0.000                |
| <b>YFSSR40</b> | 7        | 5.643     | 0.824     | 0.722     | -0.145                | 9        | 4.724     | 0.750     | 0.734     | -0.073                | 5        | 4.962     | 0.736     | 0.695     | -0.073                |
| <b>YFSSR42</b> | 3        | 2.588     | 0.412     | 0.415     | 0.009                 | 5        | 4.035     | 0.611     | 0.67      | 0.124                 | 4        | 3.963     | 0.642     | 0.538     | -0.120                |
| <b>YFSSR59</b> | 6        | 5.525     | 0.706     | 0.818     | 0.141                 | 8        | 6.351     | 0.912     | 0.837     | -0.07                 | 7        | 6.846     | 0.786     | 0.815     | 0.037                 |
| <b>PPHO130</b> | 7        | 5.955     | 0.824     | 0.779     | -0.059                | 8        | 5.626     | 0.786     | 0.802     | -0.009                | 8        | 7.746     | 0.764     | 0.802     | 0.066                 |
| <b>NP391</b>   | 3        | 2.787     | 0.294     | 0.269     | -0.096                | 8        | 3.104     | 0.220     | 0.244     | 0.080                 | 7        | 6.793     | 0.515     | 0.569     | -0.085                |
| <b>NP404</b>   | 3        | 2.970     | 0.733     | 0.600     | -0.232                | 4        | 3.033     | 0.527     | 0.550     | 0.066                 | 4        | 3.788     | 0.462     | 0.433     | -0.044                |
| <b>NP409</b>   | 8        | 6.095     | 1.00      | 0.827     | -0.217                | 8        | 5.529     | 0.667     | 0.757     | 0.104                 | 4        | 3.967     | 0.615     | 0.701     | 0.127                 |
| <b>NP428</b>   | 6        | 4.497     | 0.467     | 0.620     | 0.254                 | 5        | 3.504     | 0.378     | 0.367     | -0.001                | 5        | 4.881     | 0.806     | 0.622     | -0.382                |
| <b>NP464</b>   | 4        | 3.639     | 0.867     | 0.607     | -0.444                | 6        | 4.206     | 0.640     | 0.683     | 0.063                 | 5        | 4.688     | 0.615     | 0.556     | -0.091                |
| LOCUS          | HHPZ     |           |           |           |                       | DT       |           |           |           |                       | XCSS     |           |           |           |                       |
|                | <i>N</i> | <i>AR</i> | <i>Ho</i> | <i>He</i> | <i>F<sub>is</sub></i> | <i>N</i> | <i>AR</i> | <i>Ho</i> | <i>He</i> | <i>F<sub>is</sub></i> | <i>N</i> | <i>AR</i> | <i>Ho</i> | <i>He</i> | <i>F<sub>is</sub></i> |
| <b>YFSSR1</b>  | 5        | 4.722     | 0.769     | 0.692     | -0.116                | 5        | 4.768     | 0.657     | 0.765     | -0.046                | 5        | 4.333     | 0.8       | 0.717     | -0.120                |
| <b>YFSSR5</b>  | 6        | 5.977     | 0.843     | 0.805     | -0.259                | 6        | 5.780     | 0.865     | 0.756     | -0.143                | 5        | 4.727     | 0.545     | 0.649     | 0.166                 |
| <b>YFSSR40</b> | 6        | 5.347     | 0.709     | 0.695     | -0.111                | 6        | 5.327     | 0.75      | 0.718     | -0.134                | 6        | 5.533     | 0.867     | 0.788     | -0.103                |
| <b>YFSSR42</b> | 4        | 3.908     | 0.529     | 0.643     | -0.206                | 4        | 3.862     | 0.796     | 0.679     | -0.138                | 4        | 3.536     | 0.438     | 0.383     | -0.148                |
| <b>YFSSR59</b> | 7        | 6.933     | 0.733     | 0.869     | 0.043                 | 8        | 7.585     | 0.893     | 0.879     | -0.138                | 7        | 6.266     | 0.867     | 0.786     | -0.106                |
| <b>PPHO130</b> | 9        | 8.963     | 0.841     | 0.905     | -0.005                | 10       | 7.572     | 0.849     | 0.705     | -0.122                | 8        | 6.317     | 0.786     | 0.745     | -0.088                |
| <b>NP391</b>   | 5        | 4.753     | 0.452     | 0.407     | -0.124                | 6        | 4.385     | 0.333     | 0.471     | 0.256                 | 5        | 4.534     | 0.667     | 0.651     | -0.026                |
| <b>NP404</b>   | 4        | 3.000     | 0.682     | 0.647     | -0.086                | 3        | 2.683     | 0.6       | 0.568     | -0.158                | 4        | 3.889     | 0.667     | 0.623     | -0.073                |
| <b>NP409</b>   | 5        | 4.909     | 0.616     | 0.784     | 0.195                 | 6        | 5.663     | 0.627     | 0.818     | 0.101                 | 5        | 3.896     | 0.737     | 0.725     | 0.069                 |
| <b>NP428</b>   | 4        | 3.996     | 0.515     | 0.619     | 0.124                 | 5        | 4.447     | 0.732     | 0.585     | -0.309                | 3        | 2.724     | 0.426     | 0.362     | -0.191                |
| <b>NP464</b>   | 5        | 4.818     | 0.602     | 0.658     | 0.034                 | 8        | 5.951     | 0.717     | 0.775     | 0.040                 | 6        | 4.647     | 0.857     | 0.712     | -0.214                |
